# Supplementary material for: Coenzyme Q10 Improves Endothelial Dysfunction in Statin-Treated Type 2 Diabetic Patients
Source: Oxford University Press journal article supplement (doi:10.2337/dc08-1736), 2009-02-19
Supplement: dc08-1736_online_appendix.doc [file dc08-1736_online_appendix.doc]

**Figure A1.** Absolute % FMD pre-and post-placebo with group mean ± SEM represented

**Figure A2.** Absolute % FMD pre- and post-CoQ10 with group mean ± SEM represented

**Figure A3**. Change in FMD with placebo and CoQ10 with group mean ± SEM represented
